# Supplementary material for: What controls the low ice number concentration in the upper troposphere?
Source: Copernicus journal article supplement (doi:10.5194/acp-16-12411-2016), 2016-10-04
Supplement: Supplementary file 1 [file acp-16-12411-2016-supplement.pdf]

Supplement of Atmos. Chem. Phys., 16, 12411–12424, 2016  
<http://www.atmos-chem-phys.net/16/12411/2016/>  
doi:10.5194/acp-16-12411-2016-supplement  
© Author(s) 2016. CC Attribution 3.0 License.

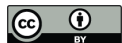

*Supplement of*

## **What controls the low ice number concentration in the upper troposphere?**

**Cheng Zhou et al.**

*Correspondence to:* Cheng Zhou (zhouc@umich.edu)

The copyright of individual parts of the supplement might differ from the CC-BY 3.0 licence.

### Supplementary figure

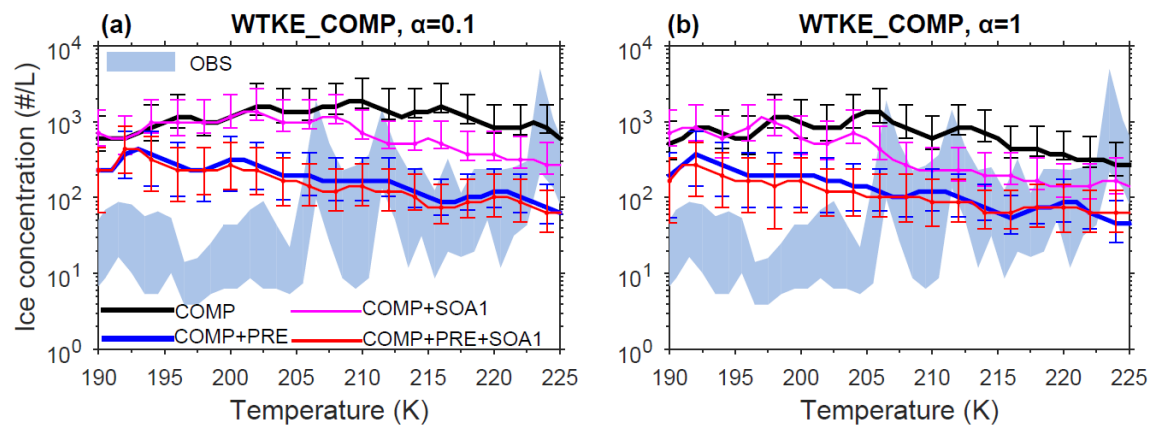

Figure S1 Same as Figure 5 except 1% of total SOA acting as IN.
